# Supplementary material for: Long-Lasting Examinations of Surface and Structural Properties of Medical Polypropylene Modified with Silver Nanoparticles
Source: PubMed Central journal article supplement (PMC6960924; doi:10.3390/polym11122018), 2019-12-05
Supplement: polymers-11-02018-s001.pdf [file polymers-11-02018-s001.pdf]

Supplementary materials:

# Long-Lasting Examinations of Surface and Structural Properties of Medical Polypropylene Modified with Silver Nanoparticles

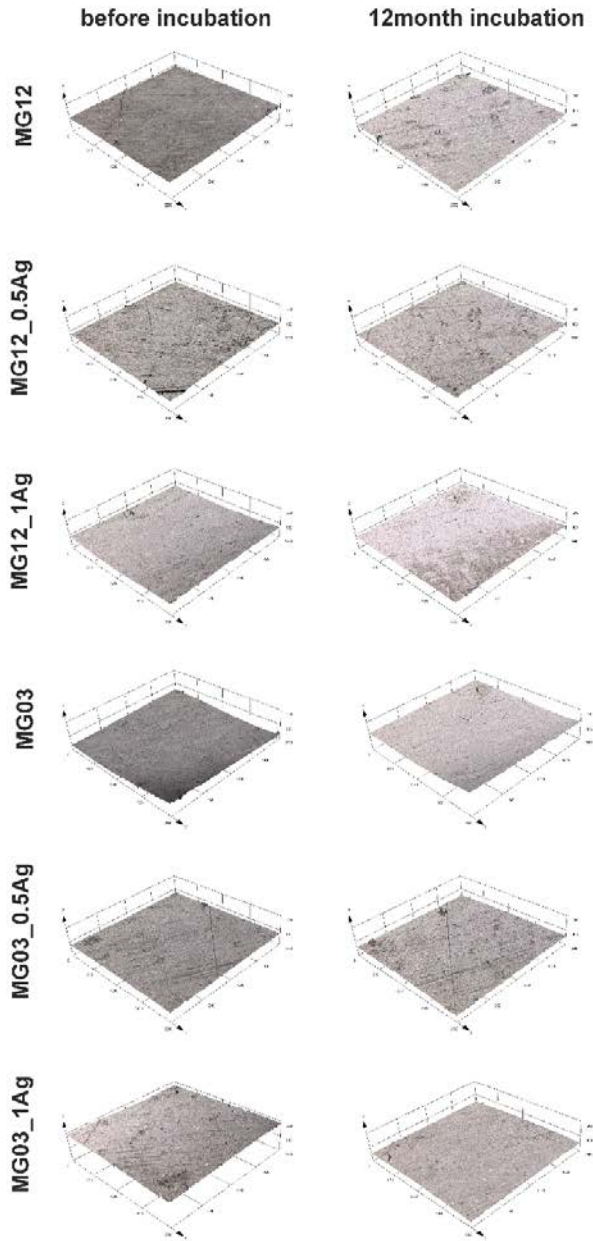

**Figure S1.** 3D confocal microscope microphotographs of pure polymers and polymers containing 0.5 and 1.0 wt. % of silver nanoparticles AgNPs before and 24 months of incubation.
